# Supplementary material for: Ultra-sensitive detection of tumorigenic cellular impurities in human cell-processed therapeutic products by digital analysis of soft agar colony formation
Source: PubMed Central journal article supplement (PMC4672267; doi:10.1038/srep17892), 2015-12-08
Supplement: srep17892-s1.pdf [file srep17892-s1.pdf]

## **Supplementary Information**

Ultra-sensitive detection of tumorigenic cellular impurities  
in human cell-processed therapeutic products  
with digital analysis of soft agar colony formation

Shinji Kusakawa, Satoshi Yasuda, Takuya Kuroda, Shin Kawamata & Yoji Sato

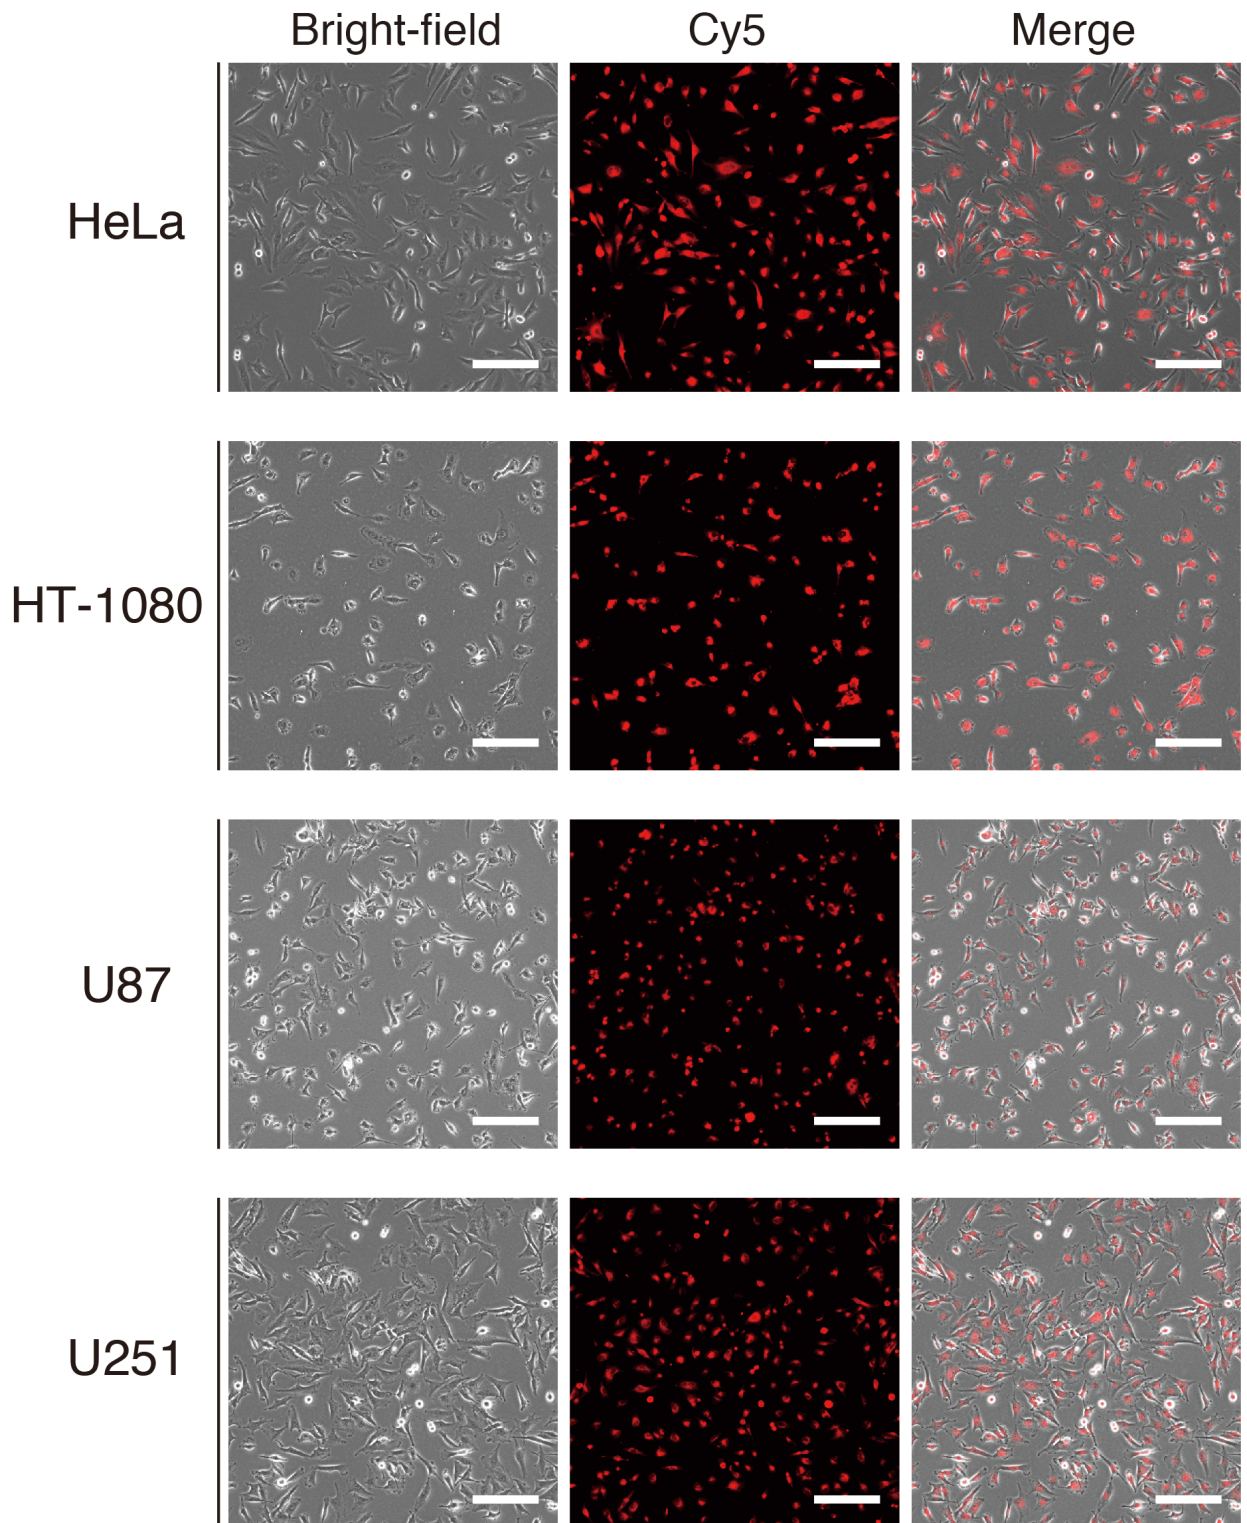

**Figure S1. Fluorescent labelling of transformed cells with CellVue**

Transformed cell lines (HeLa, HT-1080, U87, and U251 cells) were labelled with CellVue. After 24 h, CellVue-positive cells were observed by fluorescence microscopic observation with a Cy5 filter. Representative bright-field, fluorescent (Cy5), and merged images of transformed cell lines were shown (100x ; scale bars, 200  $\mu$ m).

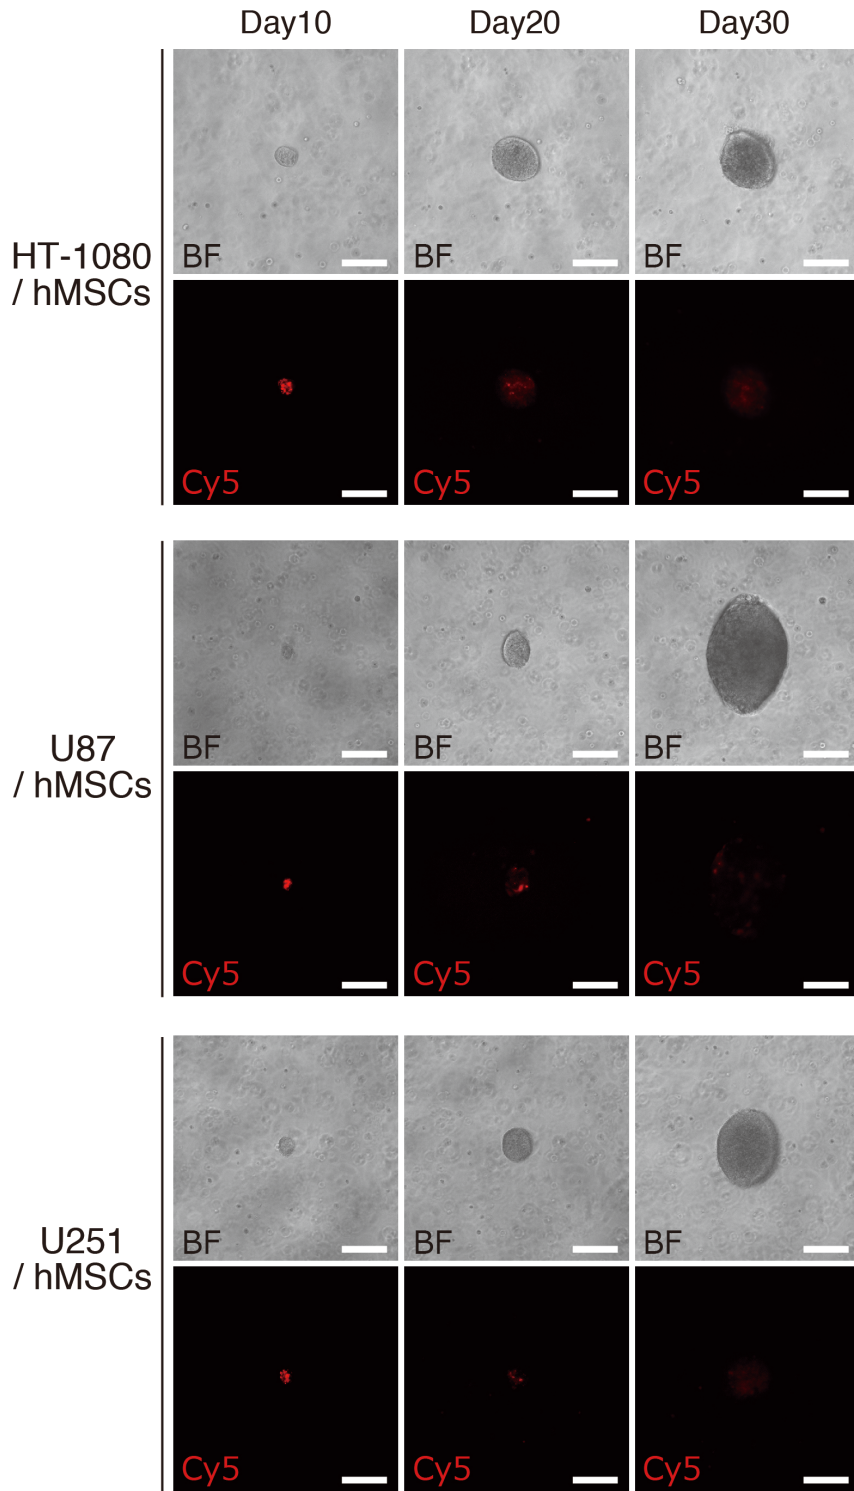

**Figure S2. Various single transformed cells spiked into normal cells have the ability to form colonies in soft agar culture**

Cell suspensions containing U87, U251 and HT-1080 cells labelled with CellVue and hMSCs were distributed into 48 wells of a 96-well culture plate at a concentration of one HeLa cell with 12,500 hMSCs per well and cultured in soft agar media for 30 days. CellVue-labelled cells were observed and tracked by fluorescence microscopy with a Cy5 filter for 30 days. Representative bright-field (BF) and fluorescent (Cy5) images of formed colony were shown (magnification, 100x ; scale bars, 200  $\mu$ m). hMSC, human mesenchymal stem cells.

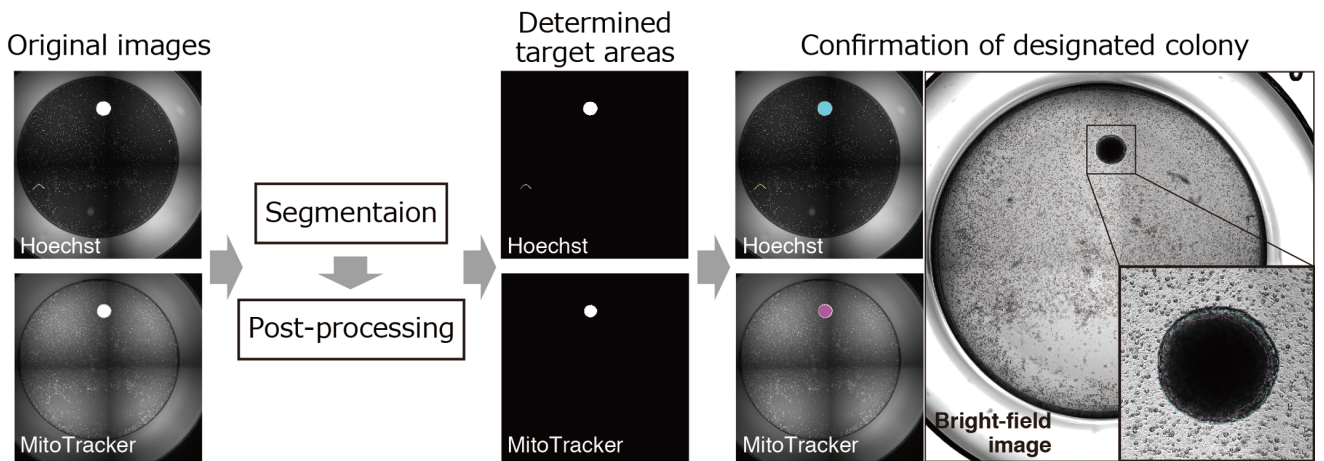

**Figure S3. Simple overview of automated image analysis of colonies in soft agar culture**

The script for the image analysis merging different colors to detect transformed cell-derived positive colonies was prepared, with the exclusion of false-positive colony images. Initially, the areas showing fluorescent intensity were roughly segmented as an image at each color channel. The recognized areas were refined with a sieve post-processing operation. The criteria of filtering determined the target area at each color channel (size,  $>6000$ ; circularity,  $>0.4$ ; fluorescence intensity,  $>100$ ), and target areas overlapping at two channels were designated as positive colonies. In addition, careful examination of bright-field images was performed to confirm colony formation.



**Table S1. Efficiency of single cell-derived colony formation of tumorigenic cell lines in soft agar culture with or without hMSCs (12,500 cells)**

|                                    | HT-1080                  | HT-1080/<br>hMSC | U87        | U87/<br>hMSC | U251      | U251/<br>hMSC            |
|------------------------------------|--------------------------|------------------|------------|--------------|-----------|--------------------------|
| Efficiency of colony formation (%) | 15.9 ± 11.1 <sup>a</sup> | 30.7 ± 14.3      | 44.9 ± 8.1 | 64.1 ± 20.3  | 4.0 ± 1.3 | 32.6 ± 10.8 <sup>#</sup> |

<sup>a</sup> The ratio of the total number of colonies to the number of transformed cells dispensed in a 96-well plate were defined as the colony-forming efficiency of transformed cells in soft agar culture. Values are means ± SD of three experiments. Statistical significance was determined using Student's *t*-test (<sup>#</sup> *P* < 0.05, between transformed cells with or without co-cultures). hMSC, human mesenchymal stem cells.
